# Supplementary material
Source: Copernicus journal article supplement (doi:10.5194/egusphere-2026-2617)
Supplement: Supplementary file 1 [file egusphere-2026-2617-supplement.pdf]

1 **Supporting information for:**

2

3 **Classification and quantification of low-visibility events using deep**

4 **learning over eastern China**

5

6 Yuting Liang<sup>1</sup>, Shitong Zhao<sup>1</sup>, Dantong Liu<sup>1\*</sup>, Changhao Wu<sup>1,2,3</sup>, Li Yi<sup>4</sup>, Xingcan Jia<sup>5</sup>

7

8 <sup>1</sup>School of Earth Sciences, Zhejiang University, Hangzhou, China

9 <sup>2</sup>Yunnan University, Kunming, China

10 <sup>3</sup>Yunnan International Joint Laboratory of Monsoon and Extreme Climate Disasters, Kunming,  
11 China

12 <sup>4</sup>Ocean University of China, Qingdao, China

13 <sup>5</sup>Institute of Urban Meteorology (IUM), Chinese Meteorological Administration, Beijing,  
14 China

15

16 **Contents of this file**

17 Supporting information, including data preprocessing and standardization, network architecture  
18 and attention mechanisms, hybrid loss function definition, and model training configuration  
19 (Texts S1–S4), illustration of the study domain and sampling method (Figure S1), schematic of  
20 the CNN model configuration (Figure S2), seasonal spatial patterns of PM<sub>2.5</sub> concentration  
21 (Figure S3); seasonal responses of simulated fog and haze area to PM<sub>2.5</sub> concentration (Figure  
22 S4) and summary of data sources, model performance metrics, and comparison with baseline  
23 models (Tables S1–S3)

24

25

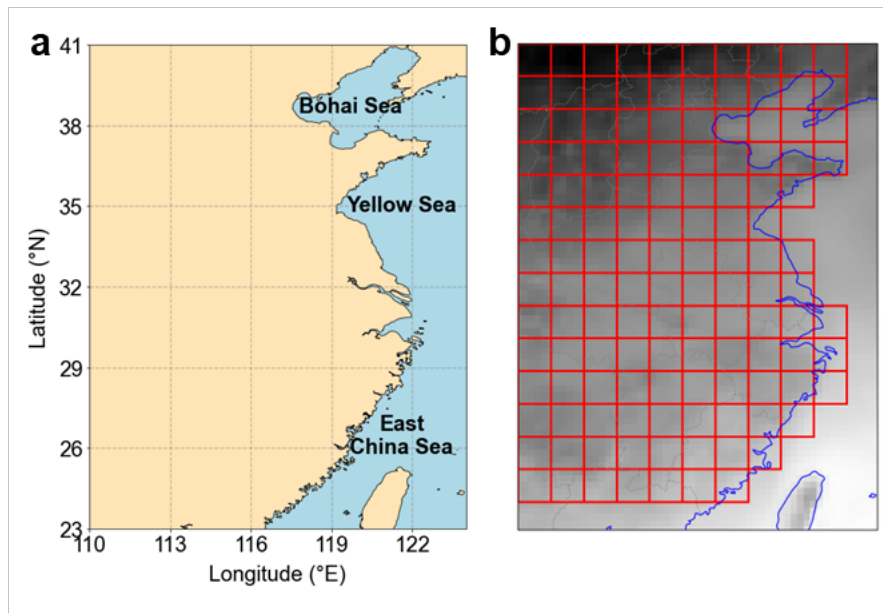

26

27 **Figure S1** Study domain and sampling method. (a) The geographical study domain includes  
28 the coastal areas of the Bohai, Yellow, and East China Seas. (b) Schematic of the window  
29 sampling method, where the domain is overlaid with the sampling grid (red).

30

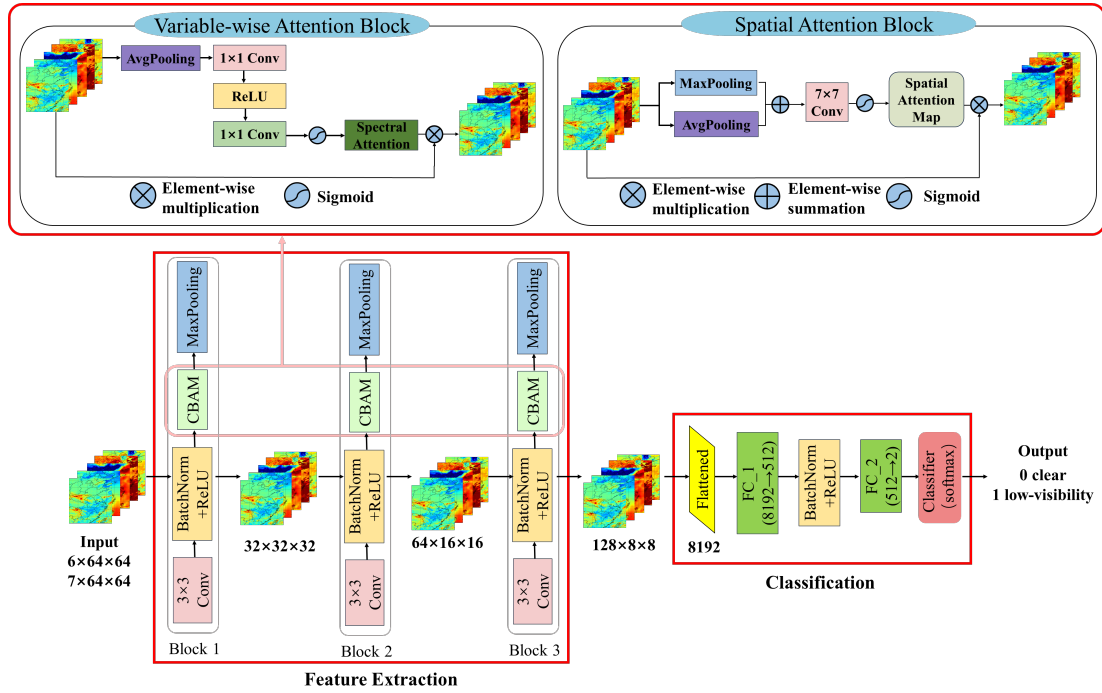

31

32 **Figure S2** Configuration of the CNN model. The model is composed of a feature extraction  
 33 module with three sequential blocks, with each block containing a 3×3 convolutional layer  
 34 (Conv), batch normalization (BN), rectified linear unit (ReLU), convolutional block attention  
 35 module (CBAM), and Max-Pooling. The CBAM contains two attention mechanisms: a channel  
 36 attention module to adaptively re-weight the importance of each feature channel, and a spatial  
 37 attention module to highlight the most salient spatial regions within the feature maps. The  
 38 classification module first flattens the feature maps into a vector, which is then processed  
 39 through a fully connected layer (FC1), followed by a BN layer and a ReLU activation, a second  
 40 fully connected layer (FC2), and a final softmax classifier to output the probabilities for the  
 41 ‘low-visibility’ and ‘clear’ classes.

42

43

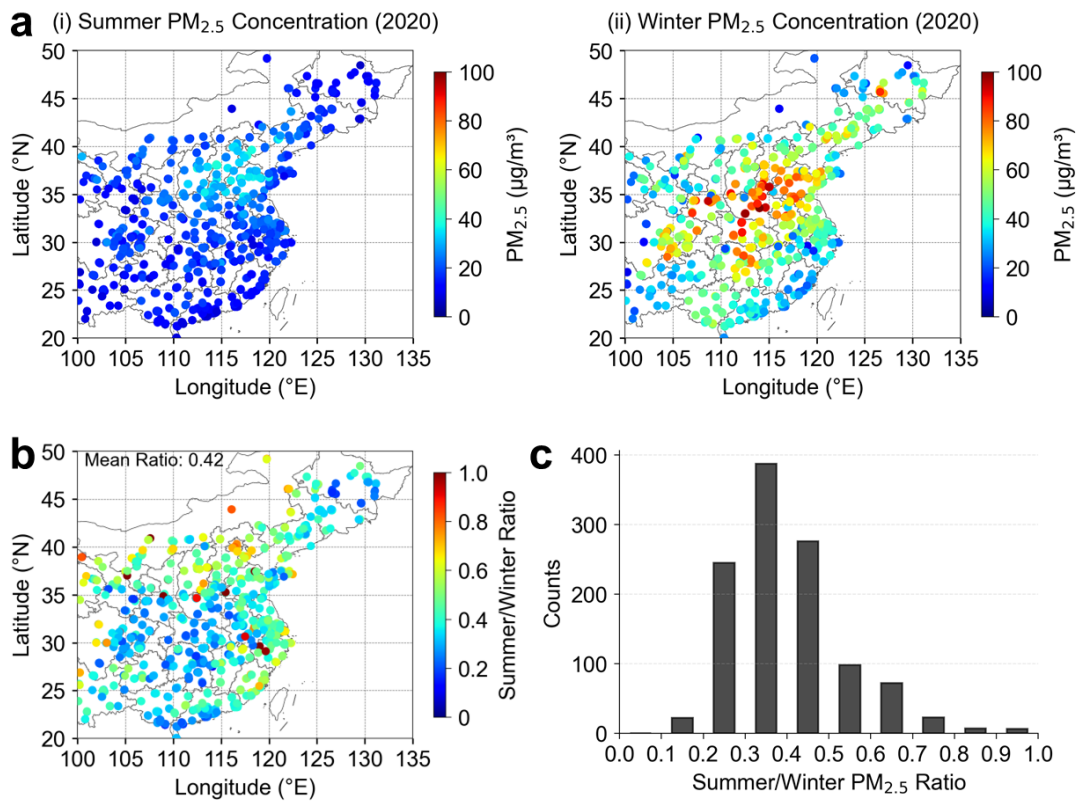

44

45 **Figure S3** Seasonal spatial patterns of PM<sub>2.5</sub> concentration in 2020. (a) Spatial distributions of  
 46 mean PM<sub>2.5</sub> concentration (µg/m<sup>3</sup>) for (i) summer and (ii) winter, and the resulting summer-to-  
 47 winter ratio map. (c) Histogram showing the frequency distribution of the summer-to-winter  
 48 PM<sub>2.5</sub> ratio from all stations.

49

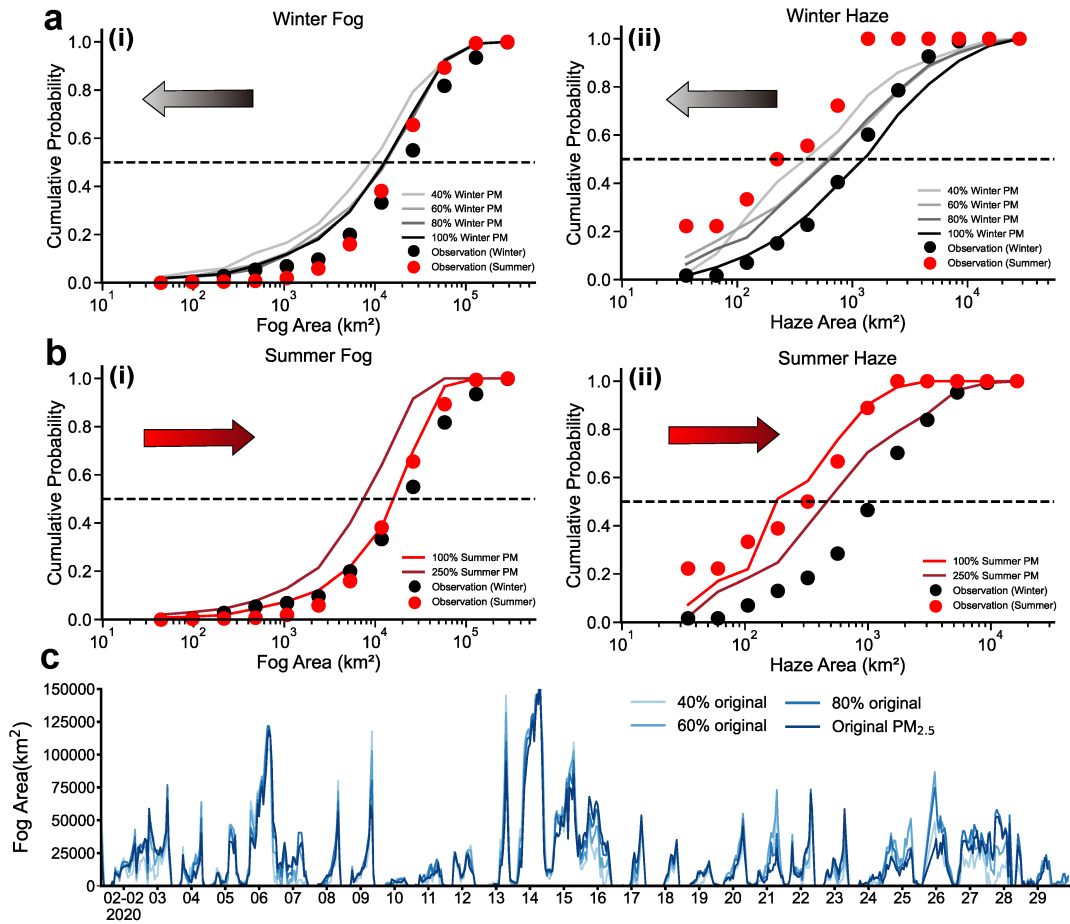

50

51 **Figure S4** Seasonal responses of simulated fog and haze area to PM<sub>2.5</sub> concentration. (a)  
 52 Cumulative probability distributions for simulated winter (i) fog and (ii) haze area at original  
 53 (100%) and reduced (80%, 60%, 40%) PM<sub>2.5</sub> concentrations, compared against observed winter  
 54 and summer values. (b) Cumulative probability distributions for simulated summer (i) fog and  
 55 (ii) haze area at original (100%) and increased (250%) PM<sub>2.5</sub> concentrations, compared against  
 56 observed winter and summer values (black dots). (c) Time series of simulated total fog area  
 57 (km<sup>2</sup>) under varying PM<sub>2.5</sub> reduction scenarios for February 2020.

58

59 **Table S1** Data used in this study. This study uses several datasets as model inputs: ECMWF  
60 global meteorological reanalysis, and FY-4A satellite data, and hourly PM<sub>2.5</sub> measurements  
61 from the China National Environmental Monitoring Centre (CNEMC). The ground-truth binary  
62 mask is derived from Chinese meteorological observations sourced from the U.S. National  
63 Climatic Data Center (NCDC/NOAA). The annual population distribution data for 2020 at 1  
64 km resolution was sourced from WorldPop. All datasets cover the 2019–2020 period.

| Name                                        | Unit              | Data type      | Data sources | Time span |
|---------------------------------------------|-------------------|----------------|--------------|-----------|
| 2m temperature                              | K                 |                |              |           |
| 2m dewpoint temperature                     | K                 | Hourly/0.25°   | ECMWF        | 2019–2020 |
| brightness temperature<br>(3.72 μm)         | K                 |                |              |           |
| brightness temperature<br>(10.8 μm)         | K                 | 15-min/4km     | FY-4A/NSMC   | 2019–2020 |
| solar zenith angle                          | °                 | 15-min/4km     | FY-4A/NSMC   | 2019–2020 |
| PM <sub>2.5</sub> measured data             | μg/m <sup>3</sup> | Hourly/Station | CNEMC        | 2019–2020 |
| ground-based visibility<br>observation data | km                | Hourly/Station | NCDC         | 2019–2020 |
| population distribution                     | km                | Annual/1km     | WorldPop     | 2020      |

65 Note:  
66 (ECMWF: <https://cds.climate.copernicus.eu/cdsapp#!/dataset/reanalysis-era5-single-levels>,  
67 FY-4A/NSMC: <http://data.nsmc.org.cn/DataPortal/cn/data/detail.html>,  
68 CNEMC: <http://air.cnemc.cn:18007/>,  
69 NCDC: <ftp://ftp.ncdc.noaa.gov/pub/data/noaa/isd-lite/>,  
70 WorldPop: <https://www.worldpop.org/>)

71

72 **Table S2** Summary of model performance metrics (Accuracy, Recall, Precision, and F1-score)  
 73 for the two models, evaluated for both ‘low-visibility’ and ‘clear’ classes.

|                             | Sat-PM | Sat  |
|-----------------------------|--------|------|
| Accuracy                    | 0.93   | 0.91 |
| clear Recall                | 0.95   | 0.94 |
| clear Precision             | 0.96   | 0.95 |
| clear F1-score              | 0.96   | 0.95 |
| low-visibility<br>Recall    | 0.81   | 0.69 |
| low-visibility<br>Precision | 0.75   | 0.73 |
| low-visibility<br>F1-score  | 0.78   | 0.71 |

74 Note: Model performance was evaluated based on a binary classification of ‘low-visibility’  
 75 (visibility  $\leq 2$  km) and ‘clear’ (visibility  $> 2$  km), with ‘low-visibility’ treated as the positive  
 76 class. The metrics are derived from a 2×2 contingency table where:

77 a = True Positive (TP): The number of correctly identified low-visibility events.

78 b = False Positive (FP): The number of clear events incorrectly identified as low-visibility  
 79 events.

80 c = False Negative (FN): The number of clear events incorrectly identified as low-visibility  
 81 events (i.e., missed fog events).

82 d = True Negative (TN): The number of correctly identified low-visibility events.

83 
$$\text{Accuracy} = \frac{a + d}{a + b + c + d}$$

84 
$$\text{clear Recall} = \frac{b}{b + d}$$

85 
$$\text{clear Precision} = \frac{d}{c + d}$$

86 
$$\text{low-visibility Recall} = \frac{a}{a + c}$$

87 
$$\text{low-visibility Precision} = \frac{a}{a + b}$$

88 
$$\text{F1-score} = 2 \times \frac{\text{Precision} \times \text{Recall}}{\text{Precision} + \text{Recall}}$$

89 **Table S3** Performance comparison of the Sat model with baseline configurations. The table  
 90 lists key performance metrics (Accuracy, Recall, and Precision) for the proposed Sat model  
 91 against three ablation study baselines: a standard CNN (no attention), a CNN with only channel  
 92 attention, and a CNN with only spatial attention. Metrics are provided for both ‘low-visibility’  
 93 and ‘clear’ classes.

| Model                      | Accuracy | low-visibility<br>Recall | low-visibility<br>Precision | clear<br>Recall | clear<br>Precision |
|----------------------------|----------|--------------------------|-----------------------------|-----------------|--------------------|
| Sat (Ours)                 | 90.95%   | 69%                      | 73%                         | 94%             | 95%                |
| CNN (no attention)         | 89.71%   | 71%                      | 67%                         | 93%             | 94%                |
| CNN<br>(channel attention) | 89.87%   | 70%                      | 68%                         | 94%             | 94%                |
| CNN<br>(spatial attention) | 89.25%   | 67%                      | 67%                         | 94%             | 94%                |

94

95

96 **Text S1** Data Preprocessing Details

97 The data for this study were compiled from satellite remote sensing, meteorological reanalysis,  
98 and ground-based observations for the period 2019–2020, with a detailed summary provided in  
99 Table S1. Satellite inputs included brightness temperatures and the solar zenith angle from the  
100 FY-4A satellite (NSMC). For meteorology, we used 2-meter temperature and dewpoint  
101 temperature from the hourly, 0.25° resolution European Centre for Medium-Range Weather  
102 Forecasts (ECMWF) ERA5 global reanalysis. Ground-based observations from individual  
103 monitoring stations consisted of hourly PM<sub>2.5</sub> concentrations from the China National  
104 Environmental Monitoring Centre (CNEMC) and visibility data from the U.S. National  
105 Climatic Data Center (NCDC/NOAA). To ensure temporal consistency, all data were  
106 standardized to UTC+8. And to ensure spatial consistency across multi-source data, all inputs  
107 were resampled to the FY-4A grid (4 km resolution). Missing values were filled via nearest-  
108 neighbor interpolation. The input samples were cropped to a spatial size of 142 km × 142 km  
109 (Figure S1b) to align with the model input requirements.

110 To characterize the moisture conditions required for fog formation, we utilize 2-m temperature  
111 and dew point depression from ERA5 reanalysis (Hersbach et al., 2020). A dew point  
112 depression approaching 0 K serves as a direct proxy for near-surface saturation. These surface-  
113 level metrics are critical for distinguishing fog from low stratus clouds, as only fog requires  
114 saturation at the 2-m level while low stratus clouds maintain a non-saturated surface layer.

115 Satellite inputs comprise FY-4A brightness temperatures (BT) from shortwave (3.72 μm) and  
116 thermal (10.8 μm) infrared channels (Yang et al., 2017), alongside the solar zenith angle (SOZ)  
117 (Bessho et al., 2016). The 10.8 μm channel captures the emission temperature of optically thick  
118 layers and effectively distinguishes ground-contacting fog from colder low stratus when  
119 referenced against ERA5 surface temperatures. During daytime, the 3.72 μm channel  
120 differentiates aerosol types via particle-size-dependent scattering, where fog droplets (2–10 μm)  
121 induce efficient Mie scattering and high BTs (Pincus, 2004) while submicron haze and  
122 absorptive fog-haze exhibit suppressed reflectance. This spectral behavior is encapsulated in  
123 the Brightness Temperature Difference (BTD,  $BT_{3.72} - BT_{10.8}$ ) (Hunt, 1972), which provides a  
124 distinct negative emissivity signal for nighttime fog but becomes physically complex during  
125 the day. While coarse aerosols produce positive daytime BTDs (Ackerman, 1997), fog often  
126 presents ambiguous near-zero values as strong solar reflectance counteracts the thermal  
127 emissivity deficit (Ellrod, 1995; Rosenfeld and Lensky, 1998). To resolve these diurnal non-  
128 linearities, the model integrates SOZ and spectral data via deep learning to robustly classify fog,  
129 haze, and fog-haze across varying illumination regimes.

130

131 **Text S2** Network Architecture and Attention Mechanism

132 As illustrated in Figure S2, the model processes input tensors with shapes of (6, 64, 64) for the  
 133 Sat configuration and (7, 64, 64) for the Sat-PM configuration. The feature extraction module  
 134 learns hierarchical features through three sequential convolutional blocks. Each block contains  
 135 a 3×3 convolutional layer (Conv), batch normalization (BatchNorm) (Ioffe and Szegedy, 2015),  
 136 a rectified linear unit (ReLU) activation (Krizhevsky et al., 2012), and the dual-branch attention  
 137 module for adaptive refinement. A max-pooling layer concludes each block, progressively  
 138 reducing the spatial resolution from 64×64 to 8×8 while expanding the channel depth  
 139 (32→64→128). Following extraction, the classification module flattens the final 3D feature  
 140 map (128 × 8 × 8) into a 1D vector of 8,192 features. This vector is processed by two fully  
 141 connected (FC) layers, which reduce the dimensionality from 8,192 to 512, and finally to two  
 142 final output neurons, corresponding to the prediction scores for class 0 (clear) and class 1 (low-  
 143 visibility). Finally, a softmax activation function converts these scores into class probabilities,  
 144 and the class with the higher probability is selected as the model final prediction.  
 145 The variable-wise (channel) attention computes an importance weight vector for input  
 146 parameters using global average pooling (Hu et al., 2018):

147 
$$M_c(F) = \sigma(W_1(\delta(W_0 \cdot \text{AvgPool}(F))))$$

148 where  $\sigma$  is the Softmax function,  $F$  is the input feature map, and  $W_0 \in \mathbb{R}^{(C/L) \times C}$  and  $W_1 \in$   
 149  $\mathbb{R}^{C \times (C/L)}$  represent the weights of two convolutional layers that form a bottleneck structure,  
 150 with  $C$  being the channel count and  $L$  the compression ratio. Simultaneously, the spatial  
 151 attention module employs parallel max-pooling and average-pooling operations (Woo et al.,  
 152 2018), followed by a 7×7 convolutional kernel to enable the network to adaptively focus on  
 153 the most informative spatial areas, formulated as:

154 
$$M_s(F) = \sigma(\text{Conv}_{7 \times 7}([\text{MaxPool}(F), \text{AvgPool}(F)]))$$

155 where  $\sigma$  is the softmax function,  $\text{Conv}_{7 \times 7}$  represents the 7×7 convolution operation, and the  
 156 inputs from average and max pooling are concatenated.

157

158 **Text S3** Hybrid Loss Function

159 The Hybrid Loss function is defined as the weighted sum of Balanced Focal Loss and Dice  
160 Loss (Lin et al., 2017; Milletari et al., 2016). The two are combined with equal weighting ( $\alpha=0.5$ )  
161 to ensure the model learns both accurately and precisely:

162 
$$\text{Hybrid Loss} = \alpha \cdot \text{BalancedFocalLoss} + (1 - \alpha) \cdot \text{DiceLoss}$$

163 The Focal Loss addresses class imbalance by down-weighting easy negatives:

164 
$$\text{BalancedFocalLoss} = -\beta y_{\text{true}}(1 - p)^\gamma \log(p) - (1 - \beta)(1 - y_{\text{true}})p^\gamma \log(1 - p)$$

165 where  $p$  is the probability for the ground-truth class, the focusing parameter  $\gamma$  is set to 3.0, and  
166 the balancing coefficient  $\beta$  is set to 0.55. The Dice Loss optimizes the intersection over union:

167 
$$\text{Dice Loss} = 1 - \frac{2\sum(y_{\text{pred}} \cdot y_{\text{true}}) + \epsilon}{\sum y_{\text{pred}} + \sum y_{\text{true}} + \epsilon}$$

168 where  $y_{\text{true}}$  is the ground truth, and  $y_{\text{pred}}$  is the model prediction.

169 **Text S4** Training Configuration

170 The model was implemented in PyTorch. The model was trained using the AdamW optimizer  
171 with an initial learning rate of 0.0004 (Loshchilov and Hutter, 2019) and a weight decay of  
172 0.0005. The learning rate was dynamically managed by a scheduler that halved the rate when  
173 the validation loss plateaued for five consecutive epochs. An early stopping mechanism with a  
174 patience of ten epochs was implemented. To improve generalization, a progressive dropout  
175 strategy was applied to the fully connected layers: a higher rate (0.6) was used on the first layer  
176 to regularize high-dimensional features, while a lower rate (0.4) was applied to the second layer  
177 to preserve critical classification information (SrivastavaNitish et al., 2014).

178

179 **References**

- 180 Ackerman, S. A.: Remote sensing aerosols using satellite infrared observations, *J. Geophys.*  
181 *Res.: Atmos.*, 102, 17069–17079, <https://doi.org/10.1029/96JD03066>, 1997.
- 182 Bessho, K., Date, K., Hayashi, M., Ikeda, A., Imai, T., Inoue, H., Kumagai, Y., Miyakawa, T.,  
183 Murata, H., Ohno, T., Okuyama, A., Oyama, R., Sasaki, Y., Shimazu, Y., Shimoji, K.,  
184 Sumida, Y., Suzuki, M., Taniguchi, H., Tsuchiyama, H., Uesawa, D., Yokota, H., and  
185 Yoshida, R.: An introduction to himawari-8/9&mdash; japan&rsquo;s new-generation  
186 geostationary meteorological satellites, *J. Meteorol. Soc. Jpn.*, II, 94, 151–183,  
187 <https://doi.org/10.2151/jmsj.2016-009>, 2016.
- 188 Ellrod, G. P.: Advances in the detection and analysis of fog at night using GOES multispectral  
189 infrared imagery, *Weather Forecasting*, 10, 606–619, <https://doi.org/10.1175/1520->  
190 [0434\(1995\)010%3C0606:AITDAA%3E2.0.CO;2](https://doi.org/10.1175/1520-0434(1995)010%3C0606:AITDAA%3E2.0.CO;2), 1995.
- 191 Hersbach, H., Bell, B., Berrisford, P., Hirahara, S., Horányi, A., Muñoz-Sabater, J., Nicolas, J.,  
192 Peubey, C., Radu, R., Schepers, D., Simmons, A., Soci, C., Abdalla, S., Abellan, X.,  
193 Balsamo, G., Bechtold, P., Biavati, G., Bidlot, J., Bonavita, M., Chiara, G. D., Dahlgren,  
194 P., Dee, D., Diamantakis, M., Dragani, R., Flemming, J., Forbes, R., Fuentes, M., Geer, A.,  
195 Haimberger, L., Healy, S., Hogan, R. J., Hólm, E., Janisková, M., Keeley, S., Laloyaux, P.,  
196 Lopez, P., Lupu, C., Radnoti, G., Rosnay, P. de, Rozum, I., Vamborg, F., Villaume, S., and  
197 Thépaut, J.-N.: The ERA5 global reanalysis, <https://doi.org/10.1002/qj.3803>, 2020.
- 198 Hu, J., Shen, L., and Sun, G.: Squeeze-and-excitation networks, *Proceedings of the IEEE*  
199 *Conference on Computer Vision and Pattern Recognition*, 7132–7141, 2018.
- 200 Hunt, G. E.: Radiative properties of terrestrial clouds at visible and infra-red thermal window  
201 wavelengths, <https://doi.org/10.1002/qj.49709942013>, 1972.
- 202 Ioffe, S. and Szegedy, C.: Batch normalization: accelerating deep network training by reducing  
203 internal covariate shift, in: *Proceedings of the 32nd International Conference on Machine*  
204 *Learning, International Conference on Machine Learning*, shortConferenceName: ICML,  
205 448–456, 2015.
- 206 Krizhevsky, A., Sutskever, I., and Hinton, G. E.: ImageNet classification with deep  
207 convolutional neural networks, in: *Advances in Neural Information Processing Systems*,  
208 2012.

209 Lin, T.-Y., Goyal, P., Girshick, R., He, K., and Dollar, P.: Focal loss for dense object detection,  
210 Proceedings of the IEEE International Conference on Computer Vision, 2980–2988, 2017.

211 Loshchilov, I. and Hutter, F.: Decoupled weight decay regularization,  
212 <https://doi.org/10.48550/arXiv.1711.05101>, 4 January 2019.

213 Milletari, F., Navab, N., and Ahmadi, S.-A.: V-net: fully convolutional neural networks for  
214 volumetric medical image segmentation, in: 2016 Fourth International Conference on 3D  
215 Vision (3DV), 2016 Fourth International Conference on 3D Vision (3DV), 565–571,  
216 <https://doi.org/10.1109/3DV.2016.79>, 2016.

217 Pincus, R.: A first course on atmospheric radiation, EOS Trans. Trans. Am. Geophys. Union,  
218 85, 341–341, <https://doi.org/10.1029/2004EO360007>, 2004.

219 Rosenfeld, D. and Lensky, I. M.: Satellite-based insights into precipitation formation processes  
220 in continental and maritime convective clouds, 1998.

221 SrivastavaNitish, HintonGeoffrey, KrizhevskyAlex, SutskeverIlya, and SalakhutdinovRuslan:  
222 Dropout, J. Mach. Learn. Res., <https://doi.org/10.5555/2627435.2670313>, 2014.

223 Woo, S., Park, J., Lee, J.-Y., and Kweon, I. S.: CBAM: convolutional block attention module,  
224 Proceedings of the European Conference on Computer Vision (ECCV), 3–19, 2018.

225 Yang, J., Zhang, Z., Wei, C., Lu, F., and Guo, Q.: Introducing the new generation of chinese  
226 geostationary weather satellites, fengyun-4, <https://doi.org/10.1175/BAMS-D-16-0065.1>,  
227 2017.

228
